# Supplementary material
Source: PubMed Central journal article supplement (PMC5875345)

## Supplementary Online Content

Sellers MM, Keele LJ, Sharoky CE, Wirtalla C, Bailey EA, Kelz RR. Association of surgical practice patterns and clinical outcomes with surgeon training in university- or nonuniversity-based residency program. *JAMA Surg*. Published online January 10, 2018. 10.1001/jamasurg.2017.5449

**eAppendix 1.** Diagnosis and Procedure Codes Used in Analysis

**eAppendix 2.** Complete Matching Algorithm

**eAppendix 3.** Sensitivity Analysis

**eTable 1.** Complete Results of Match

**eFigure 1.** Distribution of Procedures per Surgeon in Practice Pattern Analysis

**eFigure 2.** Distribution of Procedures per Surgeon in Outcomes Analysis

This supplementary material has been provided by the authors to give readers additional information about their work.

## eAppendix 1. Diagnosis and Procedure Codes Used in Analysis

### CCS codes used to define cohort for practice-pattern analysis

| Category      | CCS Category Description                                                                         |
|---------------|--------------------------------------------------------------------------------------------------|
| 10, 11, 12    | Thyroidectomy and other endocrine procedures                                                     |
| 57            | Creation; revision and removal of arteriovenous fistula or vessel-to-vessel cannula for dialysis |
| 66            | Procedures on spleen                                                                             |
| 67            | Other therapeutic procedures; hemic and lymphatic system                                         |
| 70            | Upper gastrointestinal endoscopy; biopsy                                                         |
| 71, 72, 73    | Other enterostomy procedures                                                                     |
| 74            | Gastrectomy; partial and total                                                                   |
| 75            | Small bowel resection                                                                            |
| 76, 77        | Colonoscopy or proctoscopy and biopsy                                                            |
| 78, 79        | Colorectal resection; Local excision of large intestine lesion (not endoscopic)                  |
| 80            | Appendectomy                                                                                     |
| 81            | Hemorrhoid Procedures                                                                            |
| 84            | Cholecystectomy and common duct exploration                                                      |
| 85            | Inguinal and femoral hernia repair                                                               |
| 86            | Other hernia repair                                                                              |
| 87            | Laparoscopy (GI only)                                                                            |
| 89            | Exploratory laparotomy                                                                           |
| 90            | Excision; lysis peritoneal adhesions                                                             |
| 94, 96, 99    | Other OR gastrointestinal therapeutic procedures                                                 |
| 165, 166, 167 | Procedures on breast (mastectomy, lumpectomy, breast biopsy)                                     |
| 168           | Incision and drainage; skin and subcutaneous tissue                                              |
| 169           | Debridement of wound; infection or burn                                                          |
| 170           | Excision of skin lesion                                                                          |

### ICD-9 CM codes used to define cohort for patient outcome analysis

| Surgery Type                     | ICD-9 CM Codes                                                                                                                                                         | Complex (=1) |
|----------------------------------|------------------------------------------------------------------------------------------------------------------------------------------------------------------------|--------------|
| Groin hernia repair              | 53.01, 53.02, 53.03, 53.04, 53.05, 53.10, 53.11, 53.12, 53.13, 53.14, 53.15, 53.16, 53.17, 53.21, 53.29, 53.31, 53.39, 17.11, 17.12, 17.13, 17.21, 17.22, 17.23, 17.24 |              |
| Abdominal hernia repair-open     | 53.51, 53.59, 53.61, 53.69                                                                                                                                             |              |
| Abdominal hernia repair -lap     | 53.42, 53.43, 53.62, 53.63                                                                                                                                             |              |
| Umbilical hernia repair-open     | 53.41, 53.49                                                                                                                                                           |              |
| Diaphragmatic hernia repair-open | 53.72, 53.75                                                                                                                                                           | 1            |
| Diaphragmatic hernia repair-lap  | 53.71                                                                                                                                                                  | 1            |
| Cholecystectomy-open             | 51.21, 51.22                                                                                                                                                           |              |
| Cholecystectomy-lap              | 51.23, 51.24                                                                                                                                                           |              |
| Hepatectomy                      | 50.3, 50.22                                                                                                                                                            | 1            |
| Liver ablation-open              | 50.23                                                                                                                                                                  |              |
| Liver ablation-lap               | 50.25                                                                                                                                                                  |              |
| Pancreatectomy                   | 52.6, 52.7, 52.51, 52.52, 52.53, 52.59                                                                                                                                 | 1            |
| Splenectomy                      | 41.5, 41.43                                                                                                                                                            |              |
| Esophagomyotomy                  | 42.7                                                                                                                                                                   | 1            |
| Anti reflux surgery-lap          | 44.67                                                                                                                                                                  |              |
| Sleeve gastrectomy-lap           | 43.82, 44.68                                                                                                                                                           | 1            |
| Sleeve gastrectomy-open          | 43.89                                                                                                                                                                  | 1            |

|                               |                                                                      |   |
|-------------------------------|----------------------------------------------------------------------|---|
| Roux en Y gastric bypass-lap  | 44.38                                                                | 1 |
| Roux en Y gastric bypass-open | 44.31, 44.39                                                         | 1 |
| Adjustable gastric band       | 44.95                                                                | 1 |
| Other bariatric               | 44.3, 44.96, 44.97, 44.99, 44.5, 44.51, 45.9                         | 1 |
| Gastrectomy                   | 43.5, 43.6, 43.7, 43.81, 43.89, 43.91, 43.99                         | 1 |
| Vagotomy                      | 44.00, 44.01, 44.02, 44.03                                           |   |
| Gastroenterostomy             | 44.38, 44.39                                                         |   |
| Ulcer repair                  | 44.40, 44.41, 44.42                                                  |   |
| Enterectomy                   | 45.61, 45.62                                                         |   |
| Partial colectomy-lap         | 17.31, 17.32, 17.33, 17.34, 17.35, 17.36, 17.39                      |   |
| Partial colectomy-open        | 45.71, 45.72, 45.73, 45.74, 45.75, 45.76, 45.79                      |   |
| Total colectomy-lap           | 45.81                                                                |   |
| Total colectomy-open          | 45.8, 45.82, 45.83                                                   |   |
| Appendectomy                  | 47.01, 47.09                                                         |   |
| Ostomy revision               | 46.50, 46.51, 46.52, 46.40, 46.41, 46.43                             |   |
| Ostomy creation               | 46.01, 46.03, 46.10, 46.11, 46.13, 46.20, 46.21, 46.22, 46.23, 46.39 |   |
| Abdominal-perineal resection  | 48.5, 48.50, 48.51, 48.52, 48.59                                     | 1 |
| Low anterior resection        | 48.62, 48.63                                                         | 1 |
| Other proctectomy             | 48.40, 48.41, 48.42, 48.43, 48.49, 48.69                             | 1 |
| Lysis of adhesions-lap        | 54.51                                                                |   |
| Lysis of adhesions -open      | 54.59                                                                |   |
| Mastectomy                    | 85.41, 85.42, 85.43, 85.44, 85.45, 85.46, 85.47, 85.48               |   |
| Adrenalectomy                 | 07.21, 07.22, 07.29, 07.3                                            | 1 |
| Parathyroidectomy             | 06.81, 06.89                                                         |   |
| Partial thyroidectomy         | 06.2, 06.31, 06.39, 06.51                                            |   |
| Total thyroidectomy           | 06.4, 06.50, 06.52                                                   |   |

ICD9-CM codes used to define postoperative complications<sup>a</sup>

| Description                                           | ICD-9-CM Code                                                         |
|-------------------------------------------------------|-----------------------------------------------------------------------|
| Pneumonia or other respiratory complication           | 480.x-486.x, 507-507.9, 518.4, 518.5x, 518.8-518.89, 997.3x           |
| Myocardial infarction and other cardiac complications | 410.00-410.91, 997.1                                                  |
| Nervous system complications                          | 431.00-431.91, 433.00-433.91, 434.00-434.91, 436, 437.1, 997.0-997.09 |
| Deep venous thrombosis/pulmonary embolism             | 415.11-415.19, 453.4x, 453.8x, 453.9x                                 |
| Acute renal failure                                   | 584-584.9                                                             |
| Bleeding                                              | 998.1, 998.11, 998.12; 998.2 AND 99.0-99.09 <sup>b</sup>              |
| Postoperative infection                               | 998.5, 998.51, 998.59, 996.64                                         |
| Mechanical wound complication                         | 998.13, 998.3-998.32                                                  |
| Septicemia                                            | 038-038.9, 790.7, 998.02                                              |
| Return to operating room <sup>b</sup>                 | 06.02, 34.03, 54.12, 54.61, 54.92                                     |
| Other                                                 | 998.8, 998.89, 998.9, E87.00 <sup>b</sup>                             |

<sup>a</sup> Diagnosis code only included if not present on admission

<sup>b</sup> Procedure codes

## eAppendix 2. Complete Matching Algorithm

- 1) Match exactly for the following variables:
  - (a) Hospital ID
- 2) Subject to (1), fine balance on the following variables:
  - (a) Surgeon experience (years from training)
  - (b) Primary surgical specialty
  - (c) Secondary surgical specialty
- 3) Subject to (1) and (2), minimize distance between cases and controls for the following variables:
  - (a) Age
  - (b) Number of comorbidities
  - (c) Median income (USD)
  - (d) Income missing
  - (e) Male
  - (f) Hispanic
  - (g) African-American
  - (h) Other race
  - (i) Elective admission
  - (j) Emergency admission
  - (k) Urgent admission
  - (l) Medicare
  - (m) Medicaid
  - (n) Commercial insurance
  - (o) Self insurance
  - (p) Other type of payment
  - (q) Surgeon age
  - (r) Surgeon experience (years from training)
  - (s) Total volume
  - (t) Volume of complex operations
  - (u) Volume of essential operations
  - (v) Comorbidities
    1. Congestive Heart Failure
    2. Cardiac Arrhythmias
    3. Valvular Disease
    4. Pulmonary Circulation Disorders
    5. Peripheral Vascular Disorders
    6. Hypertension, Uncomplicated
    7. Hypertension, Complicated
    8. Paralysis
    9. Other Neurological Disorders
    10. Chronic Pulmonary Disease
    11. Diabetes, Uncomplicated
    12. Diabetes, Complicated
    13. Hypothyroidism
    14. Renal Failure
    15. Liver Disease
    16. Peptic Ulcer Disease Excluding Bleeding
    17. AIDS/HIV
    18. Lymphoma
    19. Metastatic Cancer
    20. Solid Tumor Without Metastasis
    21. Rheumatoid Arthritis/Collagen Vascular
    22. Coagulopathy
    23. Obesity
    24. Weight Loss
    25. Fluid and Electrolyte Disorders
    26. Blood Loss Anemia
    27. Deficiency Anemia

28. Alcohol Abuse
  29. Drug Abuse
  30. Psychoses
  31. Depression
- (w) Procedure Types
1. Groin hernia
  2. Abdominal hernia (open)
  3. Abdominal hernia (laparoscopic)
  4. Umbilical hernia (open)
  5. Diaphragmatic hernia (open)
  6. Diaphragmatic hernia (laparoscopic)
  7. Cholecystectomy (open)
  8. Cholecystectomy (laparoscopic)
  9. Hepatectomy
  10. Liver ablation (open)
  11. Liver ablation (laparoscopic)
  12. Pancreatectomy
  13. Splenectomy
  14. Esophagectomy
  15. Esophagomyotomy
  16. Anti-reflux operations (laparoscopic)
  17. Sleeve gastrectomy (laparoscopic)
  18. Sleeve gastrectomy (open)
  19. Roux en Y Gastric Bypass (laparoscopic)
  20. Roux en Y Gastric Bypass (open)
  21. Adjustable laparoscopic band placement
  22. Other bariatric operations
  23. Gastrectomy
  24. Vagotomy
  25. Gastroenterostomy
  26. Operations for ulcers
  27. Enterectomy
  28. Partial colectomy (laparoscopic)
  29. Partial colectomy (open)
  30. Total colectomy (laparoscopic)
  31. Total colectomy (open)
  32. Appendectomy
  33. Ostomy reversal or revision
  34. Ostomy creation
  35. Proctectomy (abdominal perineal resection)
  36. Proctectomy (low anterior resection)
  37. Proctectomy (other)
  38. Lysis of Adhesions (laparoscopic)
  39. Lysis of Adhesions (open)
  40. Mastectomy
  41. Adrenalectomy
  42. Parathyroidectomy
  43. Partial thyroidectomy
  44. Total thyroidectomy

### eAppendix 3. Sensitivity Analysis

In an observational study, one concern is that bias from a hidden covariate can give the impression that a treatment effect exists when in fact no effect is present. Bias from hidden confounders can also mask an actual treatment effect leaving the analyst to conclude there is no effect when in fact such an effect exists. We explored this possibility using a test of equivalence and a sensitivity analysis. For the sensitivity analysis, we conducted a test of equivalence to test the hypotheses that  $\tau$  is not small. Under a test of equivalence, we test the following null hypothesis  $H_0^{(\delta)}: |\tau| > \delta$ . Rejecting  $H_0^{(\delta)}$  provides a basis for asserting with confidence that  $|\tau| < \delta$ .  $H_0^{(\delta)}$  is the union of two exclusive hypotheses:  $\bar{H}_0^{(\delta)}: \tau \leq -\delta$  and  $\bar{H}_0^{(\delta)}: \tau \geq \delta$ , and  $H_0^{(\delta)}$  is rejected if both  $\bar{H}_0^{(\delta)}$  and  $\bar{H}_0^{(\delta)}$  are rejected. We can apply the two tests without correction for multiple testing since we test two mutually exclusive hypotheses. Thus, we can test whether the estimate from our study is different from other possible treatment effects which are represented by  $\delta$ .

With a test of equivalence, it is not possible to demonstrate a total absence of effect, but if this were a randomized trial we could safely test that our estimated effect is not as large as  $\delta$ . That is, we may be able to reject  $H_0^{(\delta)}: |\tau| > \delta$ . In an observational study, however, there are additional complications. Since the treatment was not randomly assigned, it may be the case that we reject the null hypothesis of equivalence due to hidden confounding. However, using a sensitivity analysis we may find evidence that the test of equivalence is insensitive to biases from nonrandom treatment assignment.

**eTable 1.** Complete Results of Match

|                                 | NUBR Surgeons                           |         | UBR Surgeons |           | Unmatched             | Matched  |
|---------------------------------|-----------------------------------------|---------|--------------|-----------|-----------------------|----------|
|                                 | Unmatched                               | Matched | Matched      | Unmatched |                       |          |
| <b>Surgeon-level variables</b>  | Mean                                    |         |              |           | Std.Diff <sup>a</sup> | Std.Diff |
| Surgeon age, y                  | 52.63                                   | 52.43   | 52.86        | 53.27     | -0.07                 | -0.05    |
| Surgeon experience, y           | 16.10                                   | 15.84   | 16.09        | 16.42     | -0.03                 | -0.02    |
| All procedures, No.             | 145.23                                  | 144.12  | 147.5        | 133.92    | 0.09                  | -0.03    |
| Complex, No.                    | 30.94                                   | 31.01   | 31.58        | 33.29     | -0.03                 | -0.01    |
| Essential, No.                  | 121.96                                  | 120.77  | 123.21       | 109.52    | 0.12                  | -0.02    |
|                                 | Proportion of surgeons                  |         |              |           | Std.Diff              | Std.Diff |
| Surgeon sex, female             | 0.19                                    | 0.20    | 0.19         | 0.19      | -0.01                 | 0.04     |
| <b>Patient-level variables</b>  | Mean                                    |         |              |           | Std.Diff              | Std.Diff |
| Age, years                      | 56.43                                   | 56.35   | 56.35        | 56.07     | 0.05                  | 0        |
| Comorbidities, number           | 2.12                                    | 2.16    | 2.17         | 2.24      | -0.17                 | -0.01    |
| Median Income, USD              | 52449                                   | 53115   | 53228        | 53550     | -0.09                 | -0.01    |
|                                 | Mean proportion of patients per surgeon |         |              |           | Std.Diff              | Std.Diff |
| Sex-Male                        | 0.40                                    | 0.40    | 0.40         | 0.40      | 0.01                  | -0.01    |
| Ethnicity-Hispanic              | 0.12                                    | 0.10    | 0.11         | 0.10      | 0.1                   | -0.01    |
| Race-White                      | 0.79                                    | 0.77    | 0.76         | 0.74      | 0.21                  | 0.04     |
| Race-African-American           | 0.11                                    | 0.12    | 0.12         | 0.12      | -0.09                 | -0.04    |
| Race-Other                      | 0.10                                    | 0.11    | 0.11         | 0.14      | -0.21                 | -0.03    |
| Admission-Emergent              | 0.49                                    | 0.48    | 0.48         | 0.44      | 0.14                  | 0.01     |
| Admission-Urgent                | 0.09                                    | 0.09    | 0.09         | 0.08      | 0.06                  | 0.01     |
| Admission-Elective              | 0.42                                    | 0.43    | 0.43         | 0.47      | -0.17                 | -0.01    |
| Insurance-Medicare              | 0.38                                    | 0.38    | 0.37         | 0.37      | 0.06                  | 0.03     |
| Insurance-Medicaid              | 0.11                                    | 0.10    | 0.11         | 0.10      | 0.1                   | -0.05    |
| Insurance-Commercial            | 0.42                                    | 0.43    | 0.43         | 0.45      | -0.18                 | -0.01    |
| Insurance-Self                  | 0.05                                    | 0.05    | 0.05         | 0.05      | 0.03                  | -0.01    |
| Insurance-Other                 | 0.04                                    | 0.04    | 0.03         | 0.03      | 0.18                  | 0.03     |
| Income Missing                  | 0.04                                    | 0.04    | 0.04         | 0.05      | -0.09                 | 0.03     |
| <b>Comorbidities</b>            | Mean proportion of patients per surgeon |         |              |           | Std.Diff              | Std.Diff |
| Congestive Heart Failure        | 0.05                                    | 0.05    | 0.05         | 0.05      | -0.05                 | 0.02     |
| Cardiac Arrhythmias             | 0.11                                    | 0.11    | 0.11         | 0.12      | -0.13                 | 0.01     |
| Valvular Disease                | 0.03                                    | 0.04    | 0.04         | 0.04      | -0.11                 | -0.02    |
| Pulmonary Circulation Disorders | 0.01                                    | 0.02    | 0.01         | 0.02      | -0.12                 | 0.05     |
| Peripheral Vascular Disorders   | 0.03                                    | 0.04    | 0.03         | 0.04      | -0.07                 | 0.06     |
| Hypertension, Uncomplicated     | 0.40                                    | 0.40    | 0.40         | 0.39      | 0.04                  | -0.08    |
| Hypertension, Complicated       | 0.06                                    | 0.06    | 0.06         | 0.06      | -0.01                 | 0.04     |
| Paralysis                       | 0.01                                    | 0.01    | 0.01         | 0.01      | -0.04                 | -0.05    |
| Other Neurological Disorders    | 0.03                                    | 0.03    | 0.03         | 0.03      | -0.01                 | 0.04     |
| Chronic Pulmonary Disease       | 0.15                                    | 0.16    | 0.16         | 0.16      | -0.06                 | -0.02    |
| Diabetes,                       | 0.12                                    | 0.12    | 0.13         | 0.13      | -0.1                  | -0.07    |

|                                            | NUBR Surgeons                             |         | UBR Surgeons |           | Unmatched | Matched  |
|--------------------------------------------|-------------------------------------------|---------|--------------|-----------|-----------|----------|
|                                            | Unmatched                                 | Matched | Matched      | Unmatched |           |          |
| Uncomplicated                              |                                           |         |              |           |           |          |
| Diabetes, Complicated                      | 0.01                                      | 0.01    | 0.01         | 0.02      | -0.11     | -0.05    |
| Hypothyroidism                             | 0.11                                      | 0.11    | 0.11         | 0.10      | 0.02      | 0.02     |
| Renal Failure                              | 0.06                                      | 0.07    | 0.07         | 0.07      | -0.08     | 0.01     |
| Liver Disease                              | 0.05                                      | 0.05    | 0.05         | 0.05      | -0.08     | -0.03    |
| Peptic Ulcer Disease<br>Excluding Bleeding | 0.01                                      | 0.01    | 0.01         | 0.01      | -0.05     | -0.06    |
| AIDS/HIV                                   | 0.00                                      | 0.00    | 0.00         | 0.00      | -0.12     | -0.11    |
| Lymphoma                                   | 0.01                                      | 0.01    | 0.01         | 0.01      | -0.02     | 0.07     |
| Metastatic Cancer                          | 0.07                                      | 0.07    | 0.08         | 0.09      | -0.2      | -0.06    |
| Solid Tumor Without<br>Metastasis          | 0.19                                      | 0.20    | 0.20         | 0.23      | -0.17     | -0.01    |
| Rheumatoid Arthritis/<br>Collagen Vascular | 0.02                                      | 0.02    | 0.02         | 0.02      | -0.05     | -0.04    |
| Coagulopathy                               | 0.03                                      | 0.03    | 0.03         | 0.04      | -0.14     | 0.02     |
| Obesity                                    | 0.14                                      | 0.13    | 0.13         | 0.13      | 0.02      | 0.01     |
| Weight Loss                                | 0.06                                      | 0.06    | 0.06         | 0.07      | -0.14     | -0.04    |
| Fluid and Electrolyte<br>Disorders         | 0.20                                      | 0.21    | 0.20         | 0.19      | 0.06      | 0.04     |
| Blood Loss Anemia                          | 0.01                                      | 0.01    | 0.01         | 0.01      | 0.08      | -0.06    |
| Deficiency Anemia                          | 0.02                                      | 0.02    | 0.01         | 0.01      | 0.12      | 0.10     |
| Alcohol Abuse                              | 0.02                                      | 0.02    | 0.02         | 0.02      | -0.03     | 0.01     |
| Drug Abuse                                 | 0.01                                      | 0.01    | 0.01         | 0.01      | -0.03     | 0.04     |
| Psychoses                                  | 0.01                                      | 0.01    | 0.01         | 0.01      | -0.02     | 0.02     |
| Depression                                 | 0.10                                      | 0.10    | 0.09         | 0.10      | 0.02      | 0.07     |
| <b>Operations</b>                          | Mean proportion of operations per surgeon |         |              |           | Std.Diff  | Std.Diff |
| Groin hernia repair                        | 0.02                                      | 0.02    | 0.02         | 0.02      | 0.07      | -0.03    |
| Abdominal hernia<br>repair-open            | 0.05                                      | 0.04    | 0.04         | 0.07      | -0.16     | -0.03    |
| Abdominal hernia repair<br>-lap            | 0.01                                      | 0.01    | 0.01         | 0.01      | 0.01      | 0.03     |
| Umbilical hernia repair-<br>open           | 0.01                                      | 0.01    | 0.01         | 0.01      | -0.08     | -0.05    |
| Diaphragmatic hernia<br>repair-open        | 0.00                                      | 0.00    | 0.00         | 0.00      | -0.07     | -0.05    |
| Diaphragmatic hernia<br>repair-lap         | 0.01                                      | 0.01    | 0.01         | 0.01      | -0.03     | 0.05     |
| Cholecystectomy-open                       | 0.03                                      | 0.03    | 0.03         | 0.03      | -0.07     | 0.02     |
| Cholecystectomy-lap                        | 0.20                                      | 0.30    | 0.28         | 0.16      | 0.26      | 0.06     |
| Hepatectomy                                | 0.01                                      | 0.00    | 0.01         | 0.01      | -0.17     | -0.02    |
| Liver ablation-open                        | 0.00                                      | 0.00    | 0.00         | 0.00      | -0.04     | 0.00     |
| Liver ablation-lap                         | 0.00                                      | 0.00    | 0.00         | 0.00      | 0.00      | 0.00     |
| Pancreatectomy                             | 0.01                                      | 0.00    | 0.01         | 0.02      | -0.18     | -0.03    |
| Splenectomy                                | 0.01                                      | 0.01    | 0.01         | 0.01      | -0.06     | 0.10     |
| Esophagectomy                              | 0.00                                      | 0.00    | 0.00         | 0.01      | -0.17     | -0.07    |
| Esophagomyotomy                            | 0.00                                      | 0.01    | 0.00         | 0.01      | -0.13     | 0.1      |
| Anti reflux surgery-lap                    | 0.01                                      | 0.01    | 0.00         | 0.02      | -0.10     | 0.11     |
| Sleeve gastrectomy-lap                     | 0.02                                      | 0.00    | 0.00         | 0.02      | 0.00      | 0.00     |
| Sleeve gastrectomy-<br>open                | 0.00                                      | 0.00    | 0.00         | 0.00      | 0.05      | 0.00     |



|                               | NUBR Surgeons |         | UBR Surgeons |           | Unmatched | Matched |
|-------------------------------|---------------|---------|--------------|-----------|-----------|---------|
|                               | Unmatched     | Matched | Matched      | Unmatched |           |         |
| Roux en Y gastric bypass-lap  | 0.02          | 0.00    | 0.00         | 0.01      | 0.05      | 0.00    |
| Roux en Y gastric bypass-open | 0.00          | 0.00    | 0.00         | 0.00      | -0.03     | 0.00    |
| Adjustable gastric band       | 0.00          | 0.00    | 0.00         | 0.00      | -0.03     | 0.00    |
| Other bariatric               | 0.00          | 0.00    | 0.00         | 0.00      | 0.00      | 0.00    |
| Gastrectomy                   | 0.01          | 0.00    | 0.01         | 0.02      | -0.2      | -0.11   |
| Vagotomy                      | 0.00          | 0.00    | 0.00         | 0.00      | -0.03     | 0.10    |
| Gastroenterostomy             | 0.01          | 0.00    | 0.01         | 0.01      | 0.08      | -0.14   |
| Ulcer repair                  | 0.01          | 0.00    | 0.00         | 0.01      | 0.12      | 0.03    |
| Enterectomy                   | 0.05          | 0.08    | 0.06         | 0.05      | -0.03     | 0.06    |
| Partial colectomy-lap         | 0.06          | 0.03    | 0.07         | 0.04      | 0.19      | -0.14   |
| Partial colectomy-open        | 0.09          | 0.09    | 0.08         | 0.07      | 0.24      | 0.04    |
| Total colectomy-lap           | 0.00          | 0.00    | 0.00         | 0.00      | 0.04      |         |
| Total colectomy-open          | 0.00          | 0.01    | 0.01         | 0.00      | -0.02     | -0.03   |
| Appendectomy                  | 0.13          | 0.17    | 0.13         | 0.11      | 0.11      | 0.10    |
| Ostomy revision               | 0.02          | 0.03    | 0.01         | 0.02      | 0.17      | 0.12    |
| Ostomy creation               | 0.02          | 0.01    | 0.02         | 0.02      | -0.06     | -0.07   |
| Abdominal-perineal resection  | 0.01          | 0.00    | 0.00         | 0.00      | 0.11      | -0.02   |
| Low anterior resection        | 0.02          | 0.01    | 0.02         | 0.01      | 0.17      | -0.08   |
| Other proctectomy             | 0.01          | 0.00    | 0.01         | 0.01      | 0.17      | -0.02   |
| Lysis of adhesions-lap        | 0.01          | 0.00    | 0.01         | 0.01      | -0.11     | -0.02   |
| Lysis of adhesions-open       | 0.03          | 0.03    | 0.02         | 0.03      | -0.08     | 0.03    |
| Mastectomy                    | 0.09          | 0.07    | 0.05         | 0.11      | -0.09     | 0.08    |
| Adrenalectomy                 | 0.00          | 0.00    | 0.00         | 0.00      | -0.12     | -0.08   |
| Parathyroidectomy             | 0.01          | 0.00    | 0.02         | 0.01      | -0.08     | -0.30   |
| Partial thyroidectomy         | 0.01          | 0.00    | 0.01         | 0.01      | -0.08     | -0.09   |
| Total thyroidectomy           | 0.01          | 0.00    | 0.02         | 0.02      | -0.06     | -0.17   |

<sup>a</sup> Std.Diff – standardized difference, in units of standard deviation

**eFigure 1.** Distribution of Procedures per Surgeon in Practice Pattern Analysis

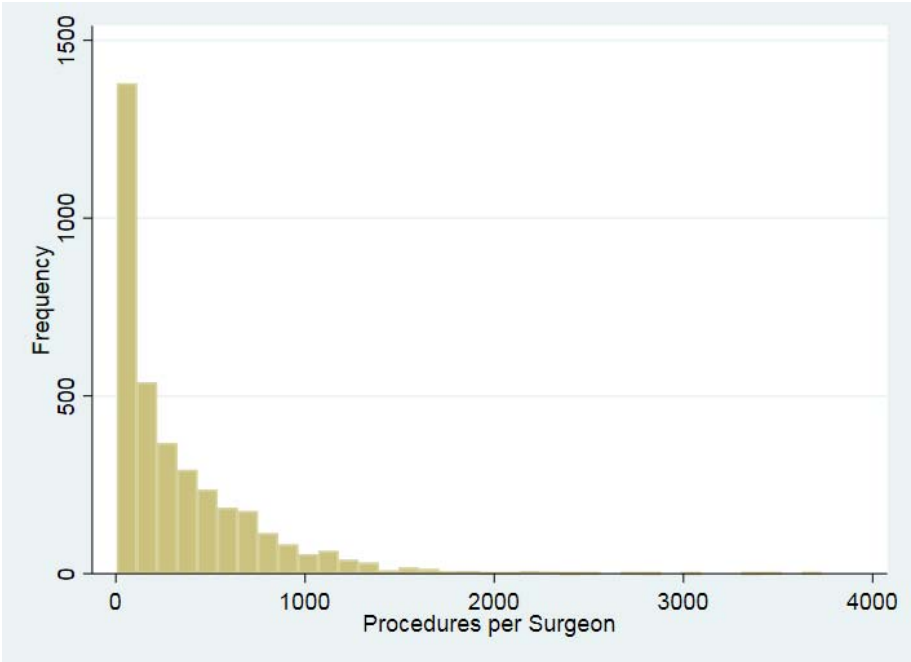

**eFigure 2.** Distribution of Procedures per Surgeon in Outcomes Analysis

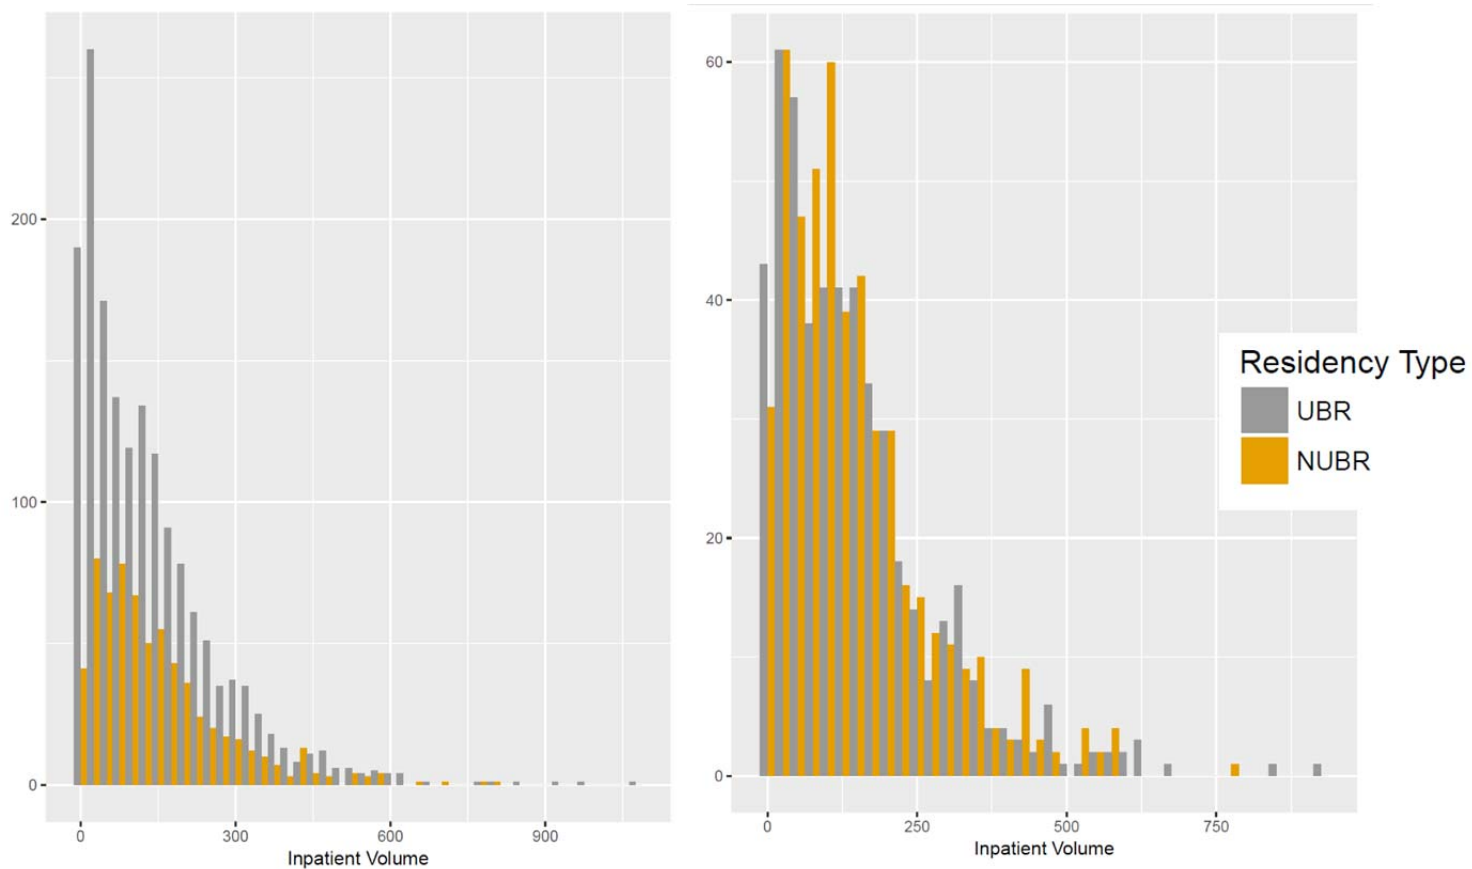

Supplement: jamasurg-e175449-s001.pdf [file jamasurg-e175449-s001.pdf]
